# Supplementary material for: Cation concentration-dependent reaction kinetics in single-atom catalysts for electrochemical CO2 reduction
Source: Royal Society of Chemistry journal article supplement (doi:10.1039/d6sc03277j), 2026-06-11
Supplement: d6sc03277j1.pdf [file d6sc03277j1.pdf]

*Supplementary Information for*

**Cation Concentration-Dependent Reaction Kinetics in Single-Atom Catalysts for Electrochemical CO<sub>2</sub> Reduction**

Lingyi Kong,<sup>a</sup> Zhe Chen,<sup>a</sup> Yuheng Chen,<sup>a</sup> Lingxiao Wang,<sup>\*,a</sup> Yu Wang<sup>a</sup> and Yafei Li<sup>\*,a</sup>

<sup>a</sup>Jiangsu Collaborative Innovation Center of Biomedical Functional Materials, Jiangsu Key Laboratory of New Power Batteries, School of Chemistry and Materials Science, Nanjing Normal University, Nanjing 210023, China.

\*To whom correspondence should be addressed. Email: lxwang46@nnu.edu.cn;  
liyafei@nynu.edu.cn

## Supplementary Figures

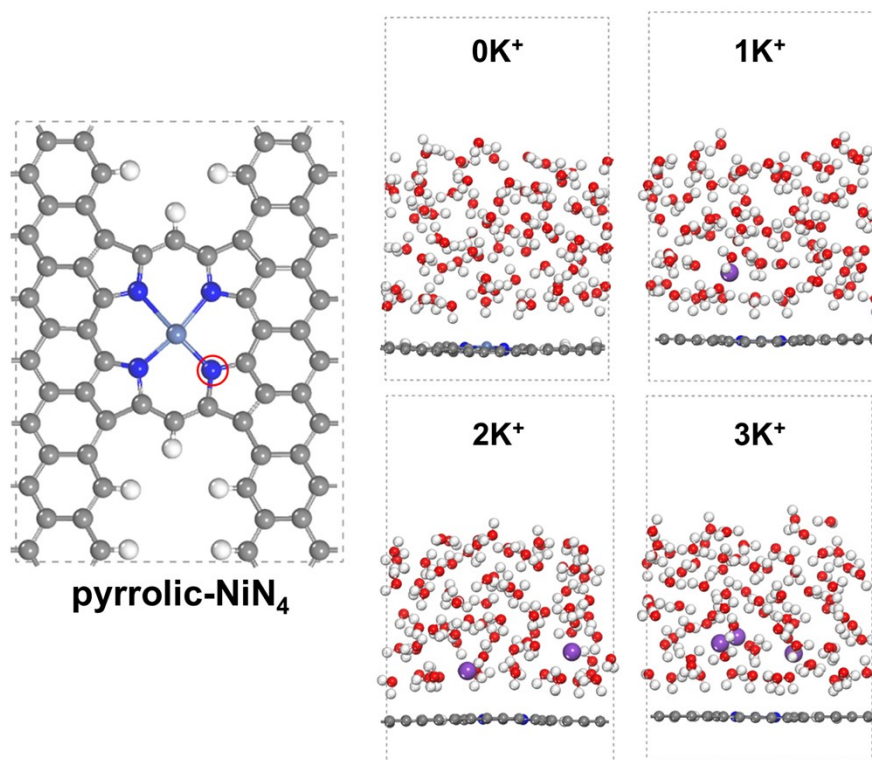

**Fig. S1.** Atomic structures of pyrrolic-NiN<sub>4</sub> with different solvent microenvironments. Gray, white, blue, indigo, red, and purple balls represent C, H, N, Ni, O, and K atoms, respectively.

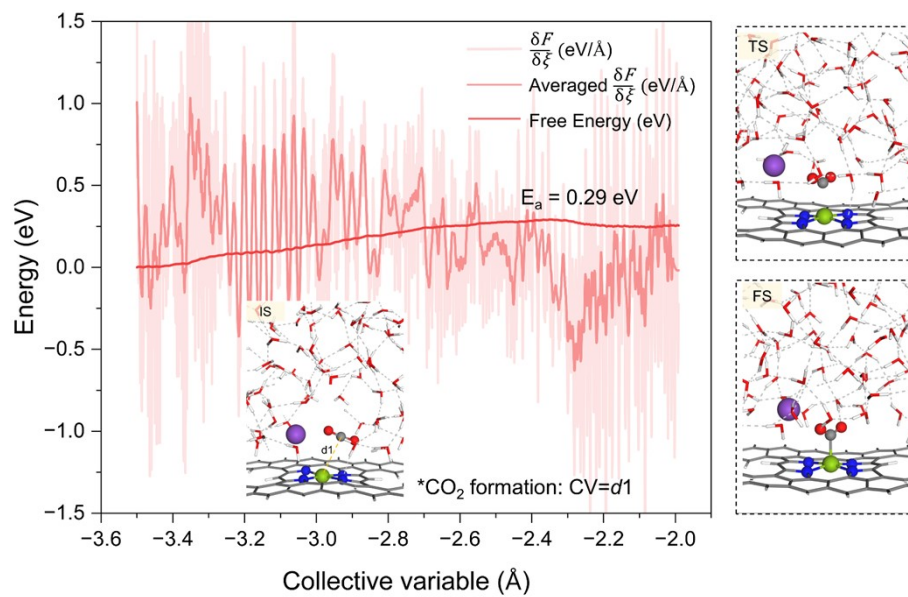

**Fig. S2.** Free energy profiles for CO<sub>2</sub> adsorption under 1K<sup>+</sup> condition. The insert is the view of the initial state (IS) while the views of the transition state (TS) and final state (FS) are displayed on the right.

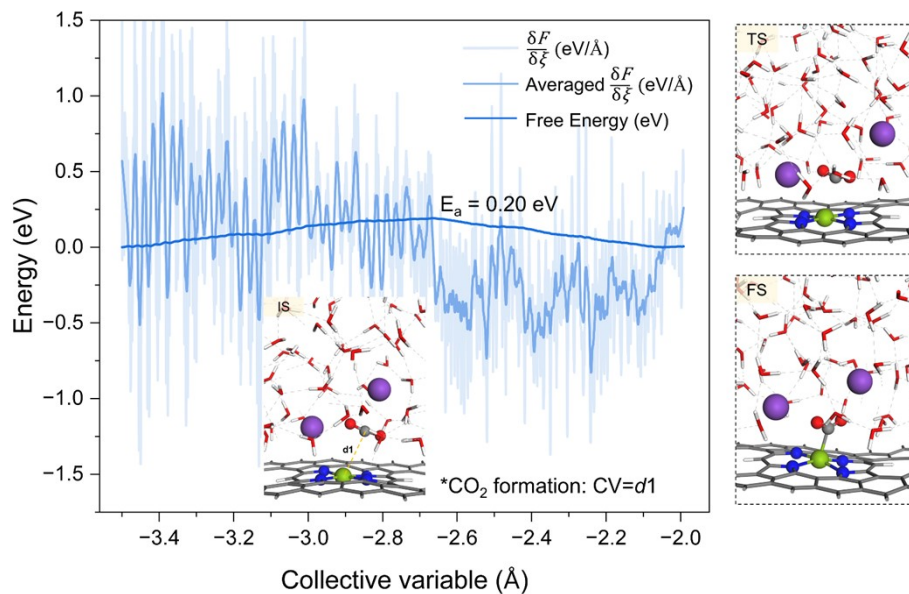

**Fig. S3.** Free energy profiles for CO<sub>2</sub> adsorption under 2K<sup>+</sup> condition. The insert is the view of the initial state (IS) while the views of the transition state (TS) and final state (FS) are displayed on the right.

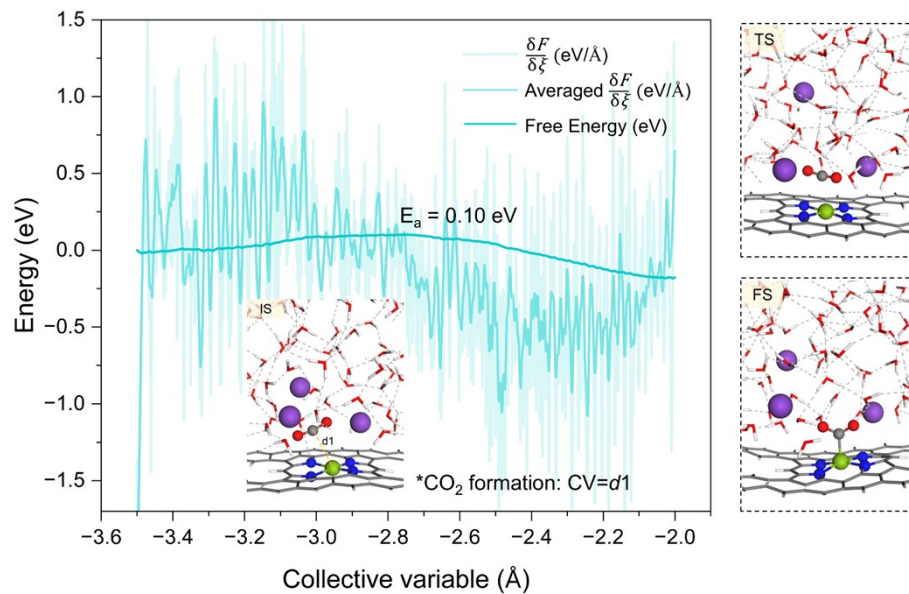

**Fig. S4.** Free energy profiles for CO<sub>2</sub> adsorption under 3K<sup>+</sup> condition. The insert is the view of the initial state (IS) while the views of the transition state (TS) and final state (FS) are displayed on the right.

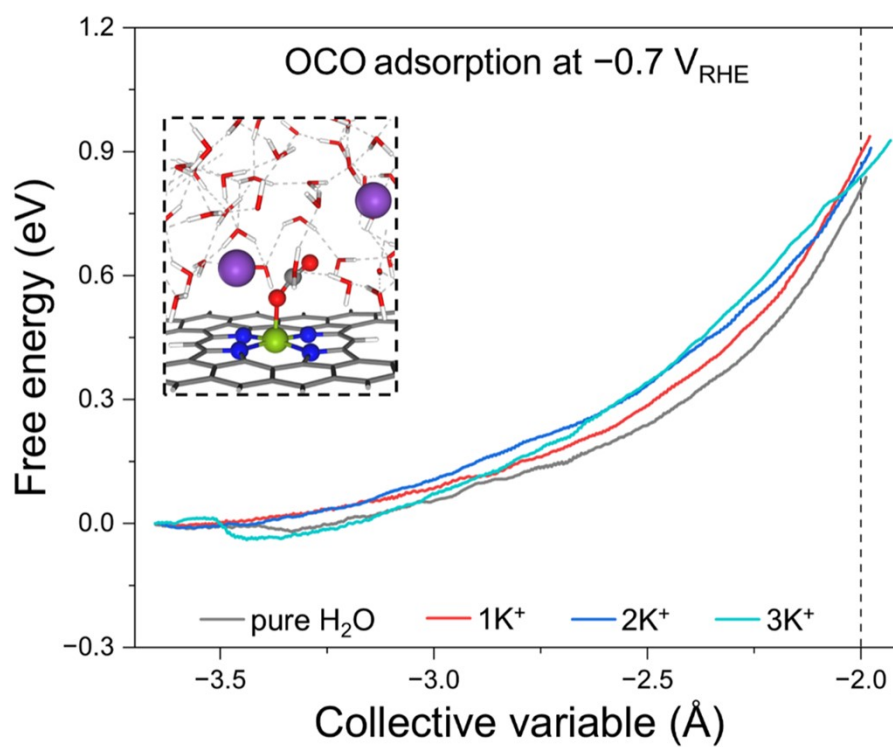

**Fig. S5.** Free energy profiles for CO<sub>2</sub> adsorption over Ni-N-C SACs under different K<sup>+</sup> conditions.

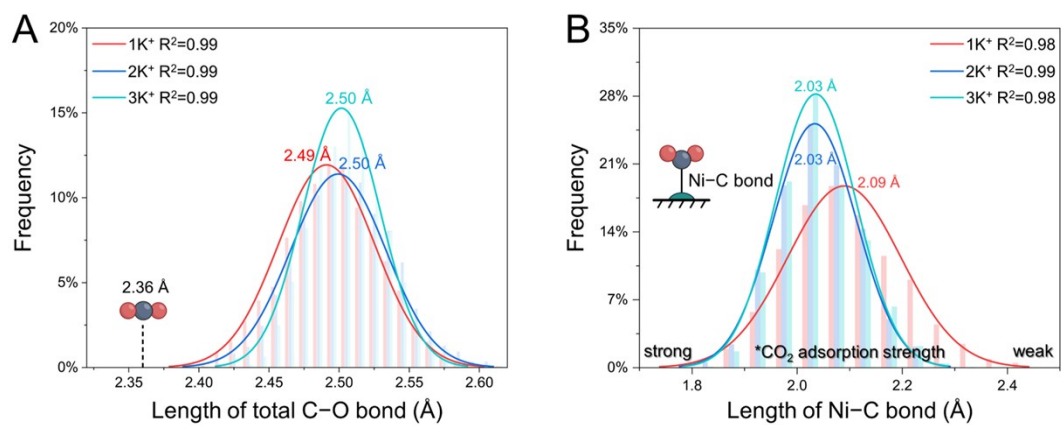

**Fig. S6.** Statistical analysis for the distribution of (A) the length of total C–O bond and (B) the length of Ni–C bond under three K<sup>+</sup> conditions.

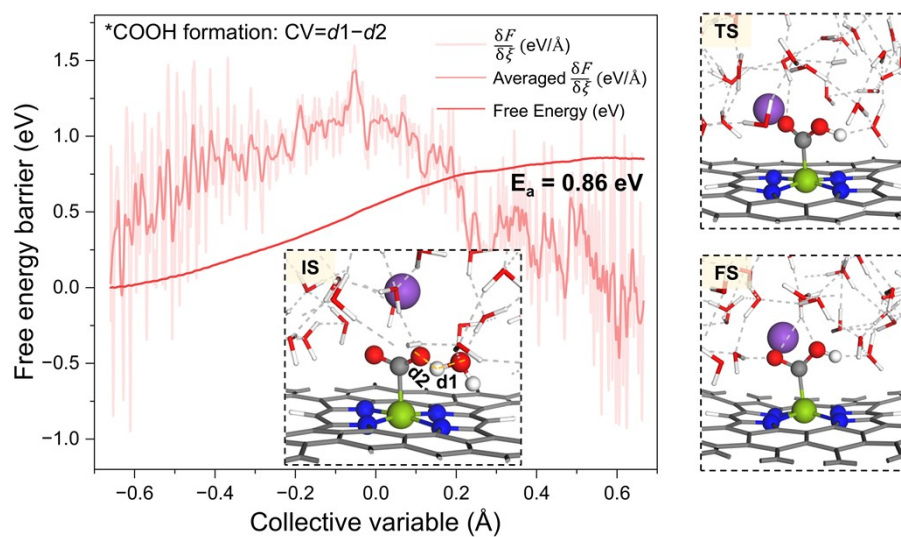

**Fig. S7.** Free energy profiles for \*COOH formation under  $1K^+$  condition. The insert is the view of the initial state (IS) while the views of the transition state (TS) and final state (FS) are displayed on the right.

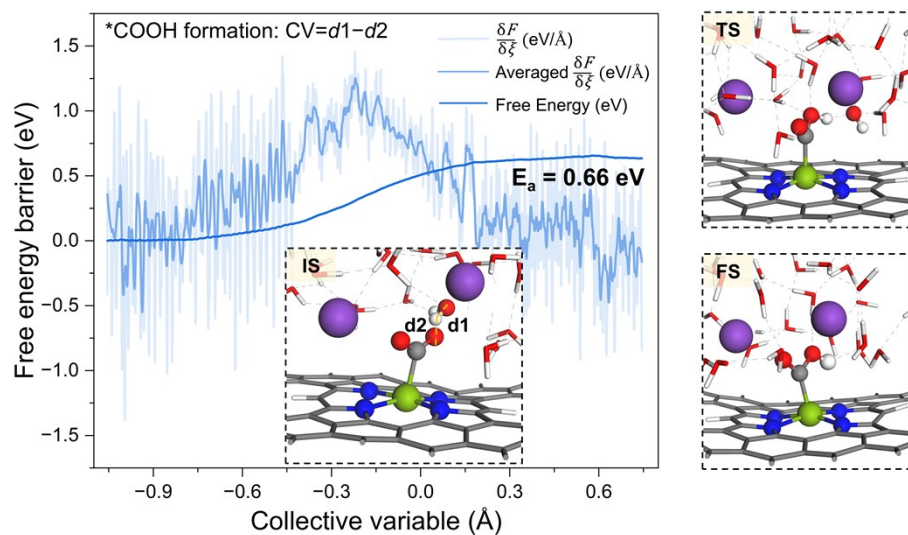

**Fig. S8.** Free energy profiles for \*COOH formation under  $2K^+$  condition. The insert is the view of the initial state (IS) while the views of the transition state (TS) and final state (FS) are displayed on the right.

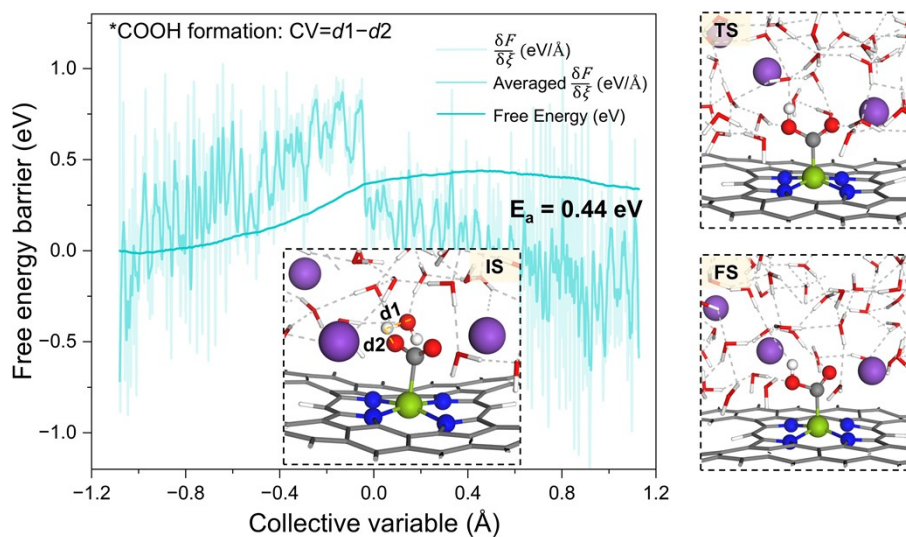

**Fig. S9.** Free energy profiles for \*COOH formation under 3K<sup>+</sup> condition. The insert is the view of the initial state (IS) while the views of the transition state (TS) and final state (FS) are displayed on the right.

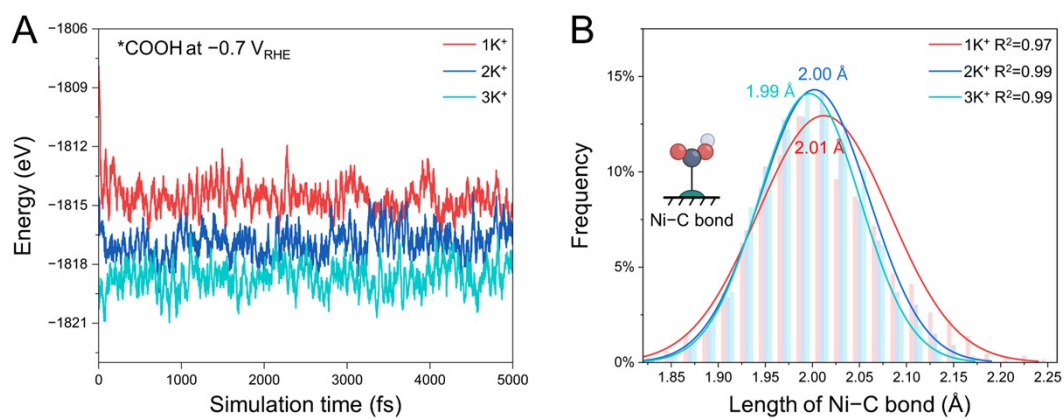

**Fig. S10.** (A) Variations of energy against the time during the constant-potential AIMD simulations for \*COOH adsorption on Ni-N-C SACs at  $-0.7 V_{RHE}$ . (B) Statistical analysis for the distribution of the length of Ni-C bond with three interfacial cation concentrations.

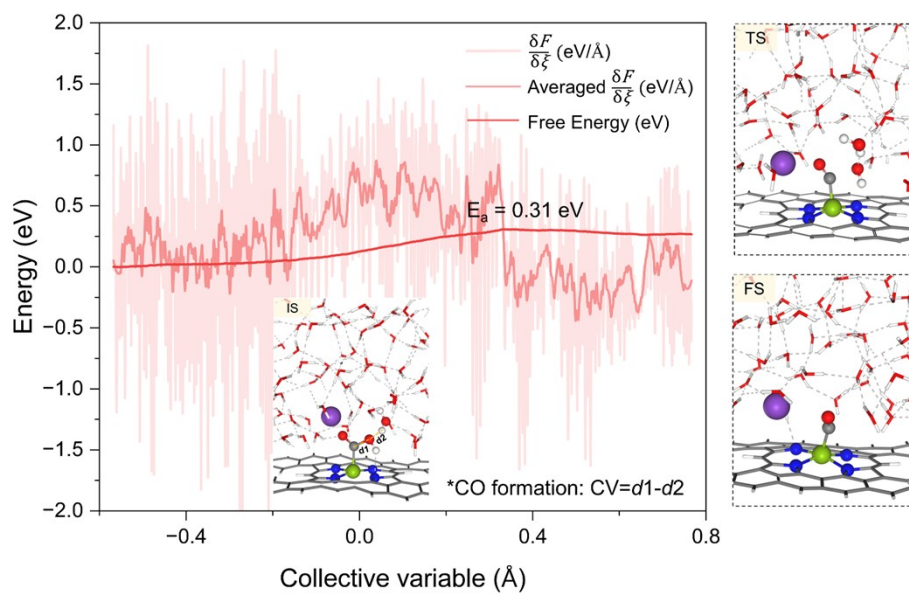

**Fig. S11.** Free energy profiles for \*CO formation under  $1K^+$  condition. The insert is the view of the initial state (IS) while the views of the transition state (TS) and final state (FS) are displayed on the right.

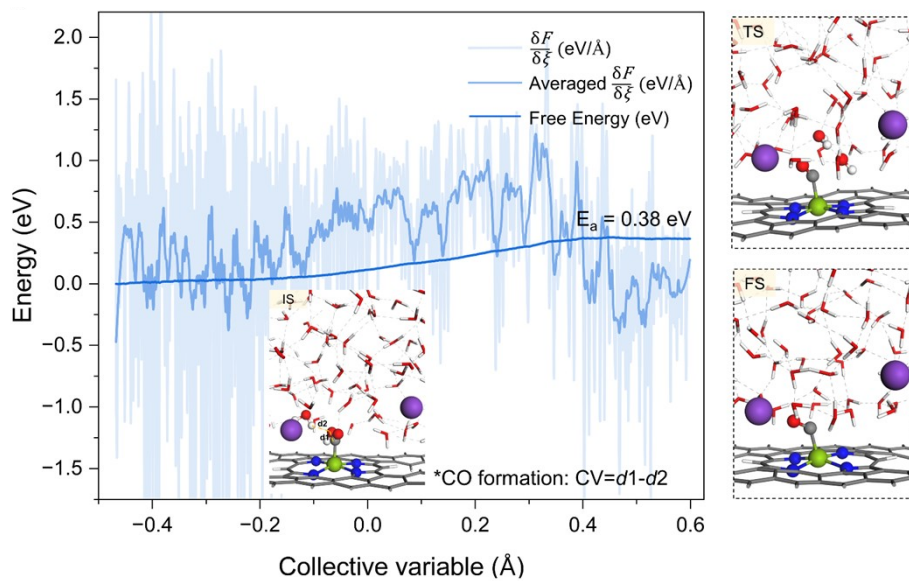

**Fig. S12.** Free energy profiles for  $^*\text{CO}$  formation under  $2\text{K}^+$  condition. The insert is the view of the initial state (IS) while the views of the transition state (TS) and final state (FS) are displayed on the right.

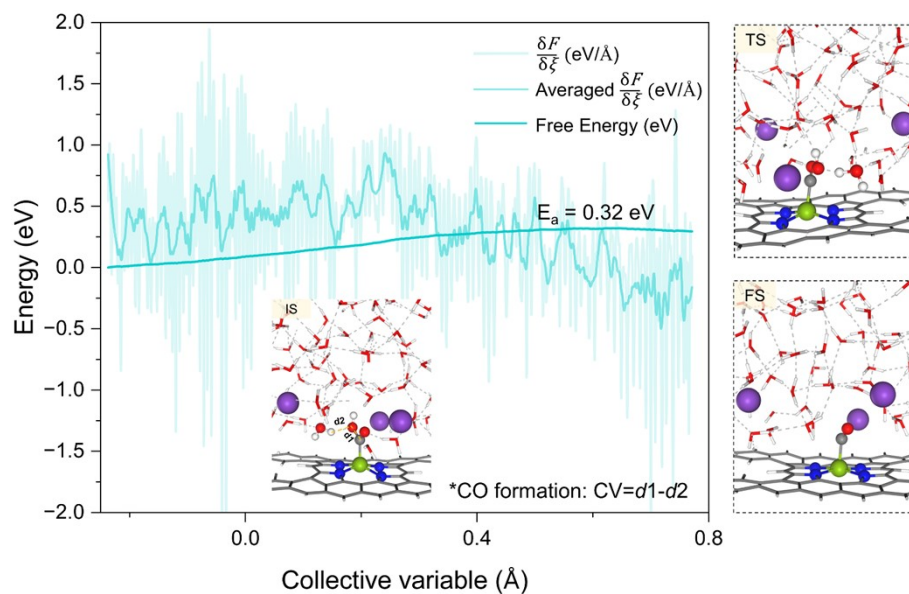

**Fig. S13.** Free energy profiles for \*CO formation under  $3K^+$  condition. The insert is the view of the initial state (IS) while the views of the transition state (TS) and final state (FS) are displayed on the right.

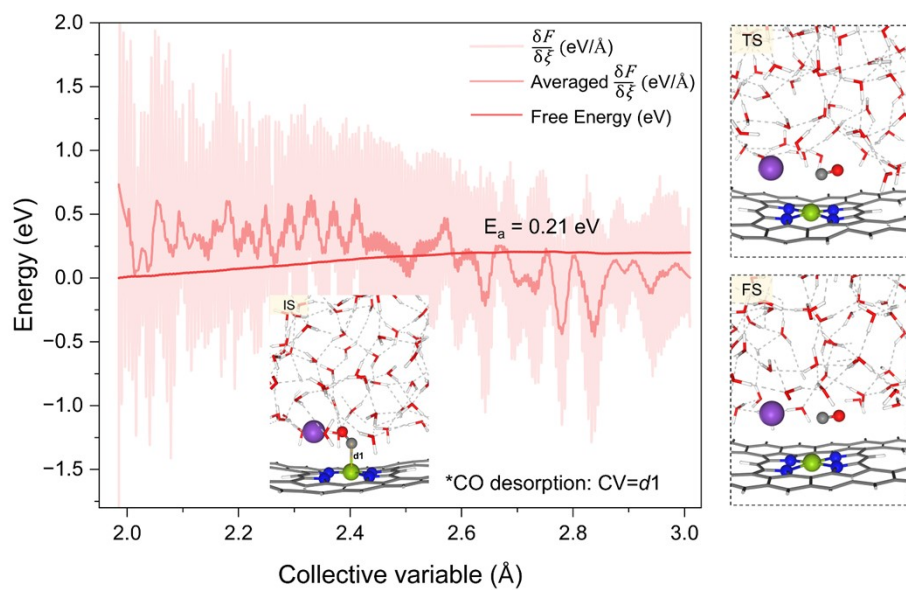

**Fig. S14.** Free energy profiles for  $^*\text{CO}$  desorption under  $1\text{K}^+$  condition. The insert is the view of the initial state (IS) while the views of the transition state (TS) and final state (FS) are displayed on the right.

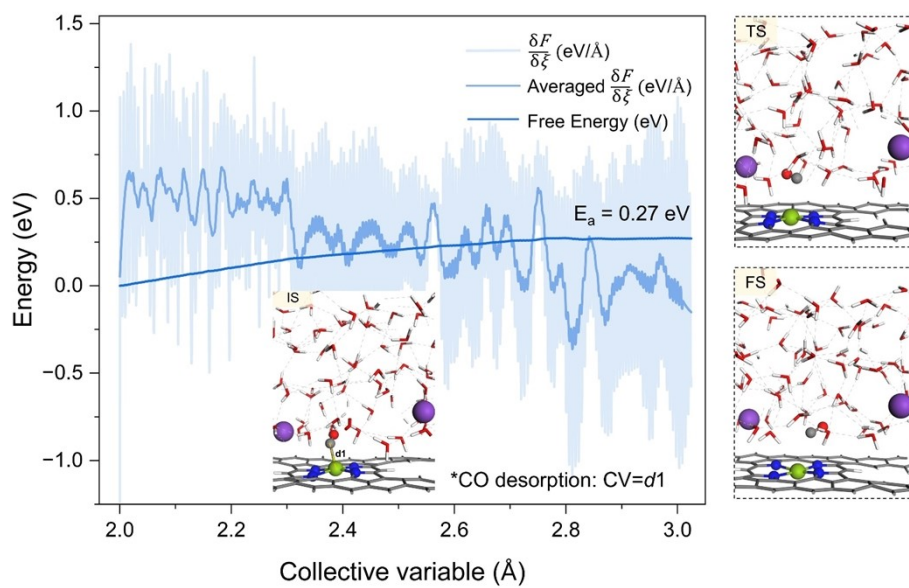

**Fig. S15.** Free energy profiles for \*CO desorption under  $2K^+$  condition. The insert is the view of the initial state (IS) while the views of the transition state (TS) and final state (FS) are displayed on the right.

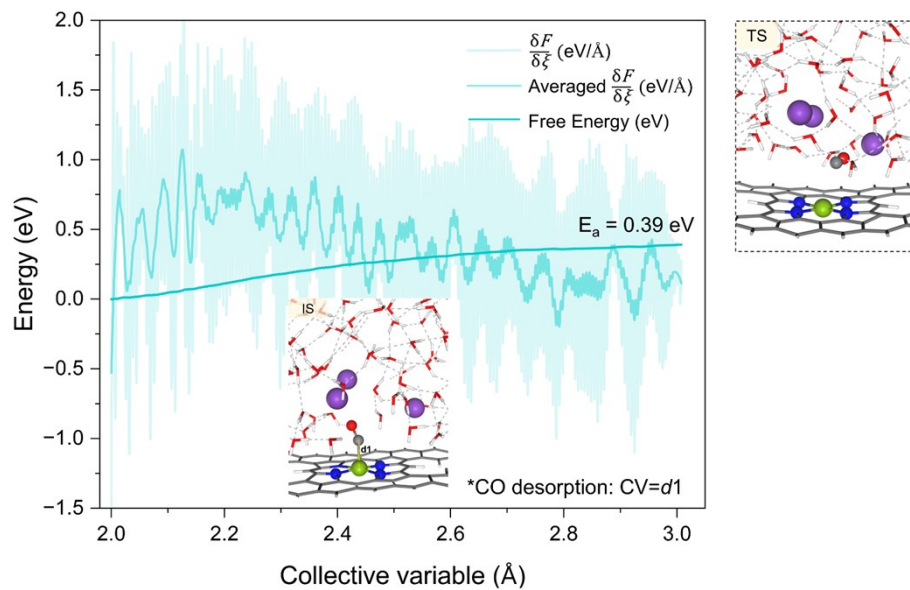

**Fig. S16.** Free energy profiles for \*CO desorption under  $3K^+$  condition. The insert is the view of the initial state (IS) while the view of the transition state (TS) is displayed on the right.

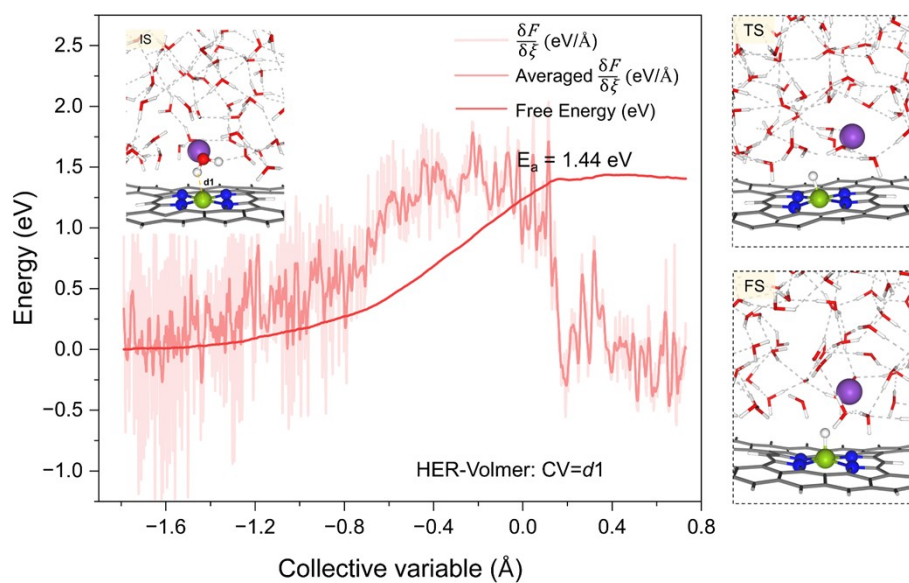

**Fig. S17.** Free energy profiles for  $^*H$  adsorption under  $1K^+$  condition. The insert is the view of the initial state (IS) while the views of the transition state (TS) and final state (FS) are displayed on the right.

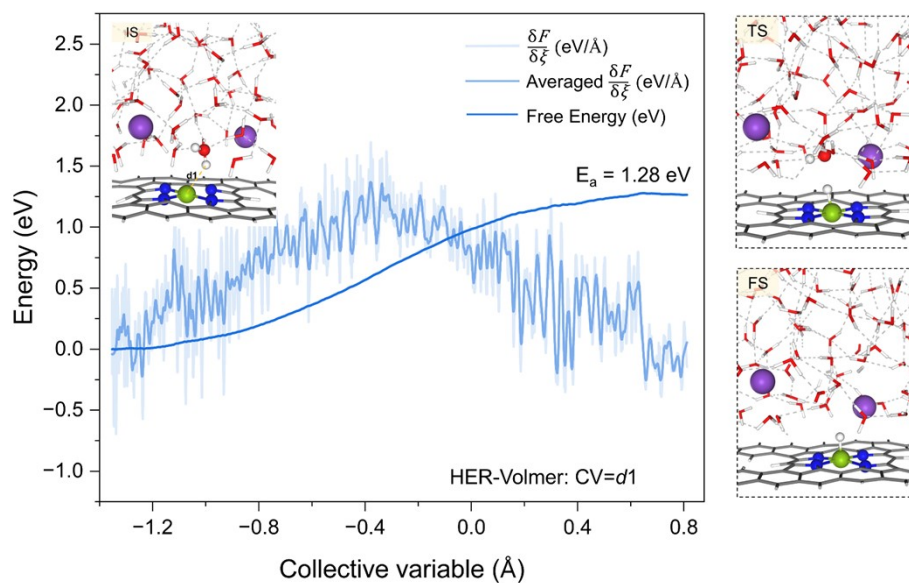

**Fig. S18.** Free energy profiles for  $^*H$  adsorption under  $2K^+$  condition. The insert is the view of the initial state (IS) while the views of the transition state (TS) and final state (FS) are displayed on the right.

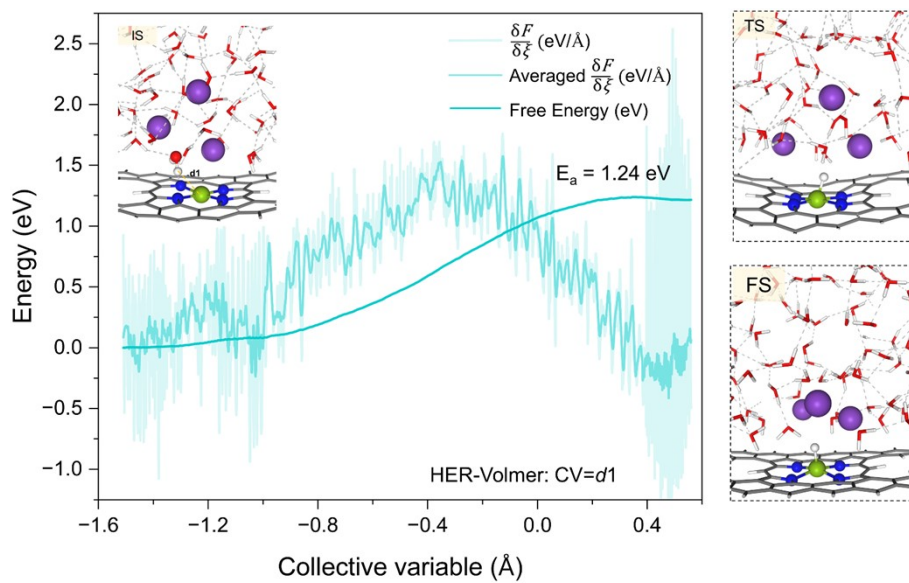

**Fig. S19.** Free energy profiles for  $^*H$  adsorption under  $3K^+$  condition. The insert is the view of the initial state (IS) while the views of the transition state (TS) and final state (FS) are displayed on the right.

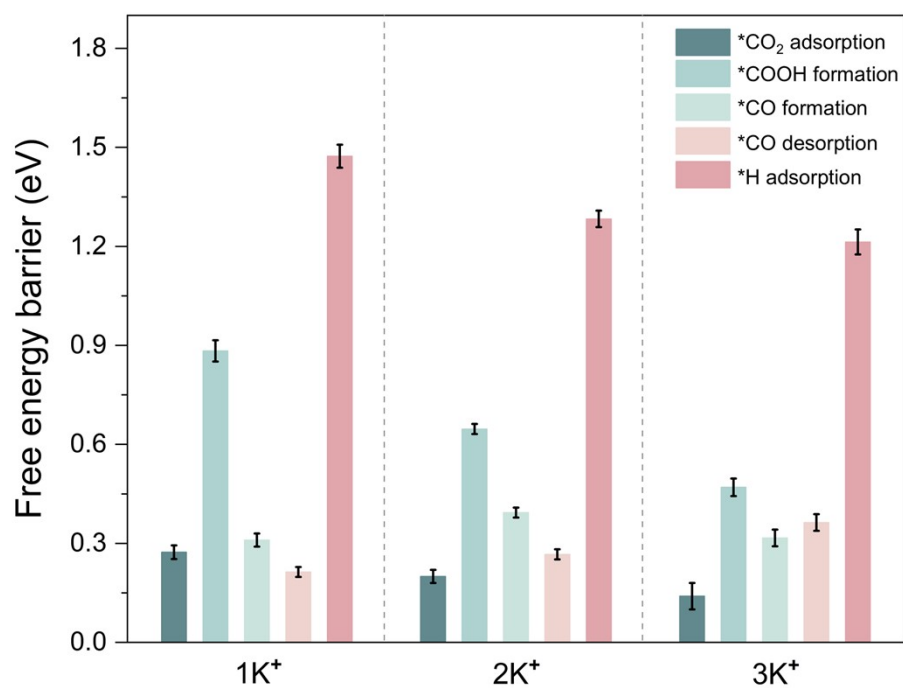

**Fig. S20.** Error bars representing the kinetic barriers of the key process of CO<sub>2</sub>RR at different cation concentrations.

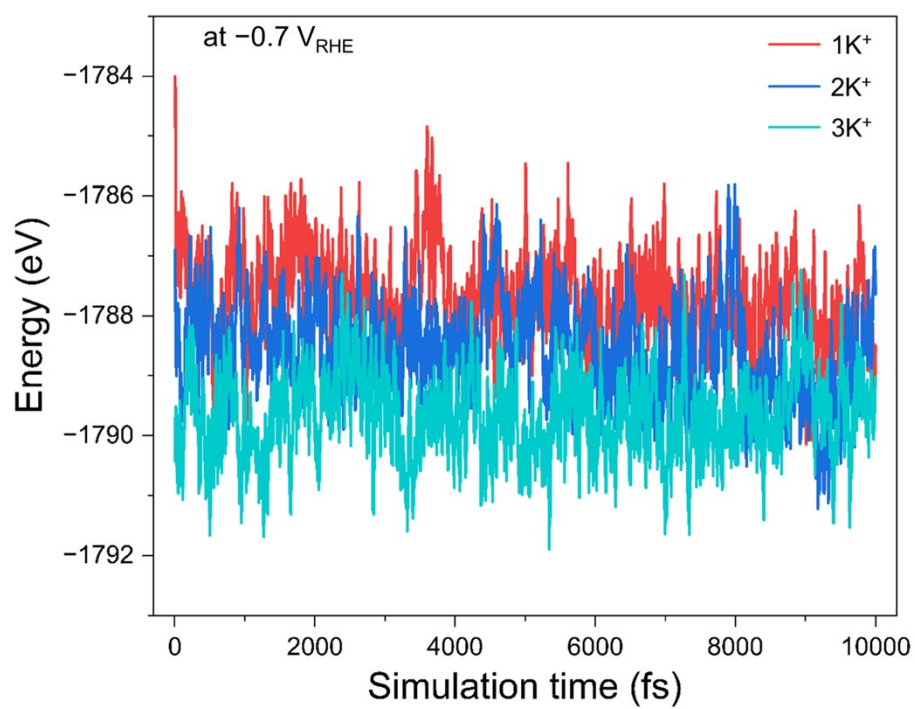

**Fig. S21.** Variations of energy against the time during the constant-potential AIMD simulations on Ni-N-C SACs at  $-0.7 V_{\text{RHE}}$ .

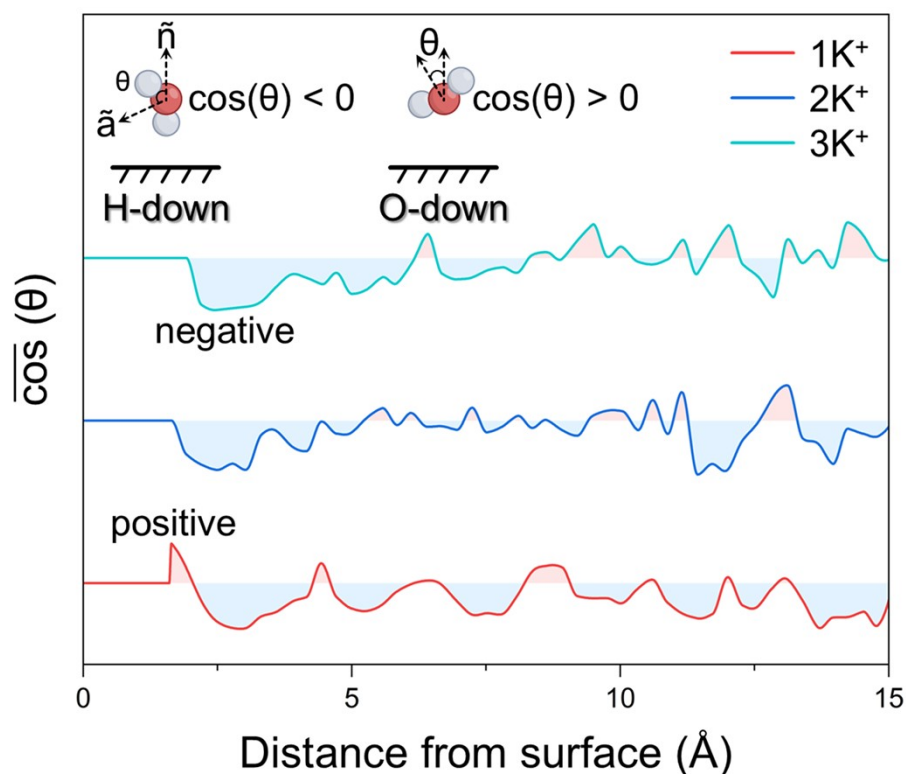

**Fig. S22.** Orientation of interfacial H<sub>2</sub>O molecules. Distribution profiles of the angle ( $\phi$ ) between the water angle bisector ( $\tilde{a}$ ) and the surface normal ( $\tilde{n}$ ).

The orientation of the explicit H<sub>2</sub>O molecules was analyzed by geometrically summarizing the cosine function of the angle ( $\phi$ ) between the water angle bisector ( $\tilde{a}$ ) and the surface normal ( $\tilde{n}$ ) in the AIMD trajectories. Specifically, the positive value of  $\cos(\phi)$  corresponds to the “O-down” orientation, while the “H-down” orientation is represented by the negative value of  $\cos(\phi)$ . In this case, the orientation of the explicit electrolyte can be quantitatively described by calculating the average value of  $\cos(\phi)$  along the z direction. In the 1K<sup>+</sup> environment, a positive peak was observed near the catalytic surface, indicating that interfacial H<sub>2</sub>O molecules are predominantly in the “O-down” orientation. In contrast, this peak shifts to the negative side in the 2K<sup>+</sup> and 3K<sup>+</sup> environments, implying that at higher cation concentrations, interfacial H<sub>2</sub>O molecules with the “H-down” orientation become dominant.

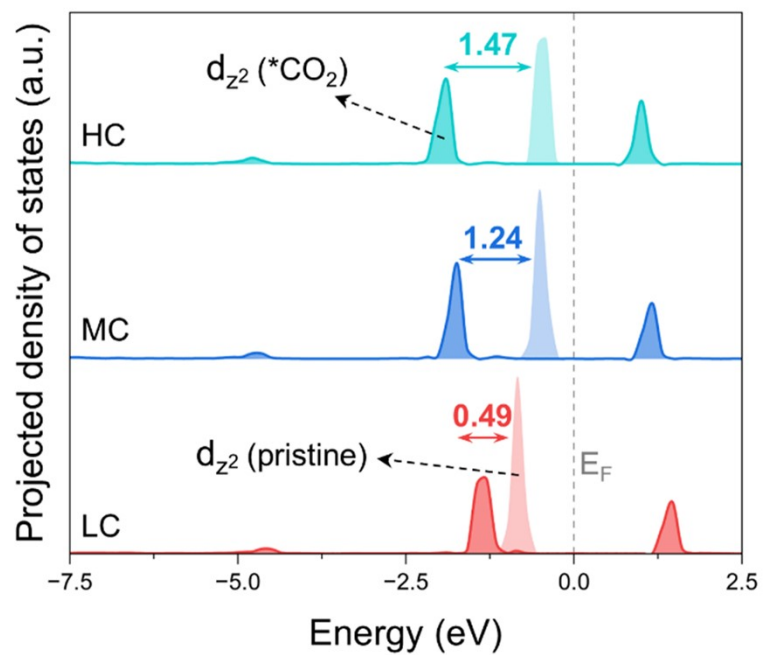

**Fig. S23.** Projected density of states of Ni-d<sub>z<sup>2</sup></sub> before and after CO<sub>2</sub> adsorption. The Fermi level (E<sub>F</sub>) was set to zero.

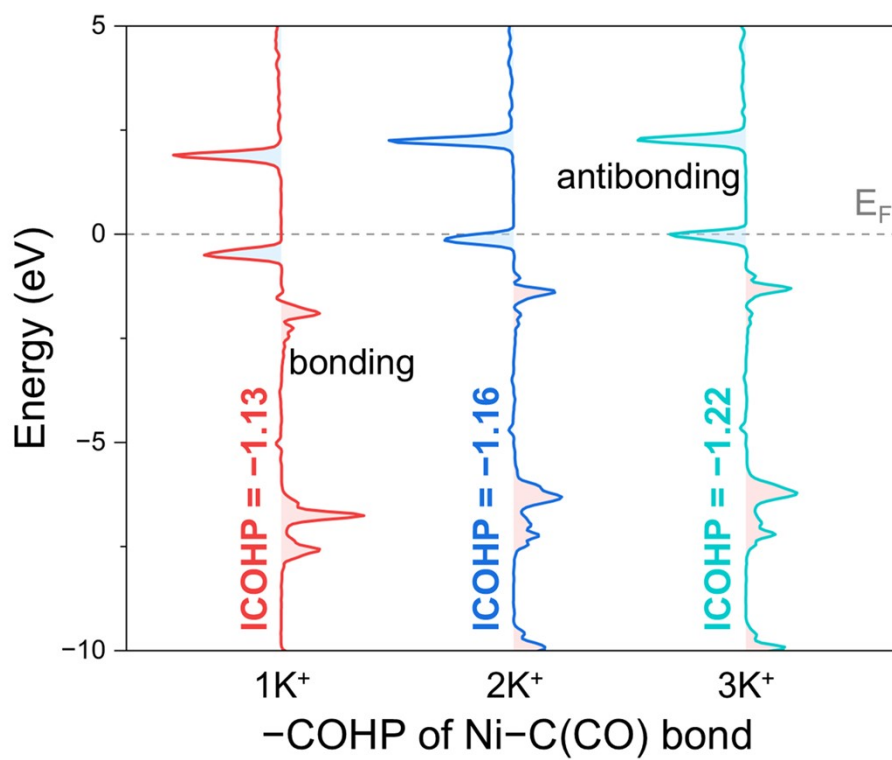

**Fig. S24.** COHP of the Ni-C (\*CO) bond under different interfacial conditions. The Fermi level ( $E_F$ ) was set to zero, with bonding and antibonding states shown on the right and left, respectively.

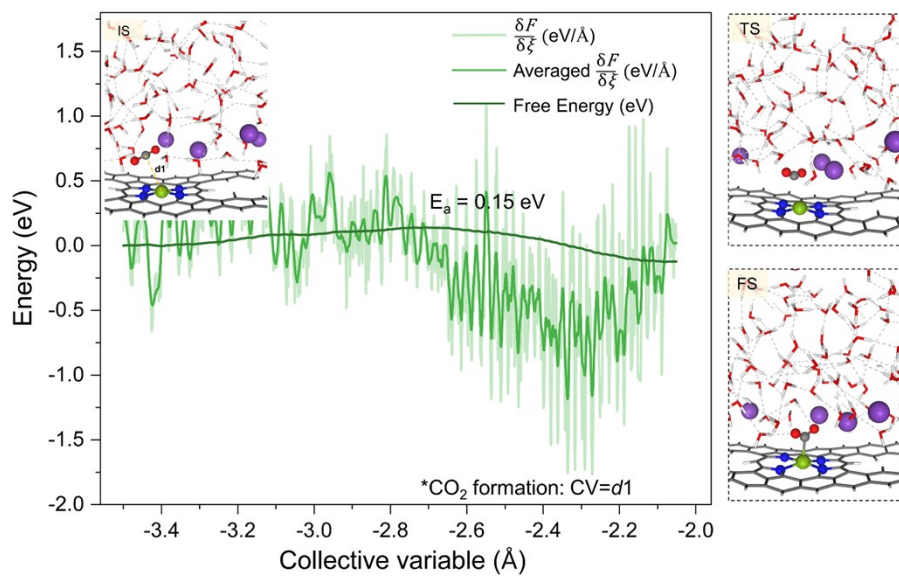

**Fig. S25.** Free energy profiles for  $^*\text{CO}_2$  adsorption under  $4\text{K}^+$  condition. The insert is the view of the initial state (IS) while the views of the transition state (TS) and final state (FS) are displayed on the right.

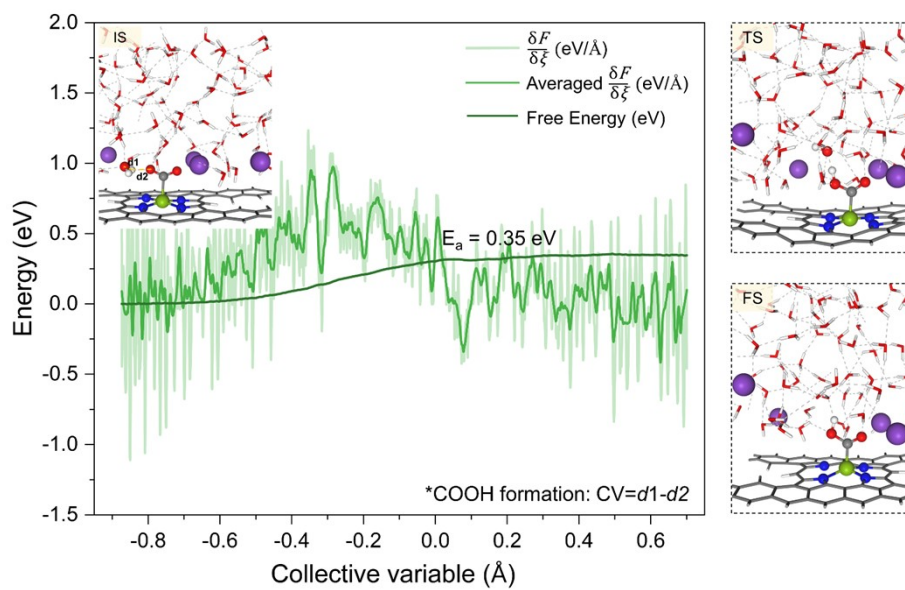

**Fig. S26.** Free energy profiles for  $^*\text{COOH}$  formation under  $4\text{K}^+$  condition. The insert is the view of the initial state (IS) while the views of the transition state (TS) and final state (FS) are displayed on the right.

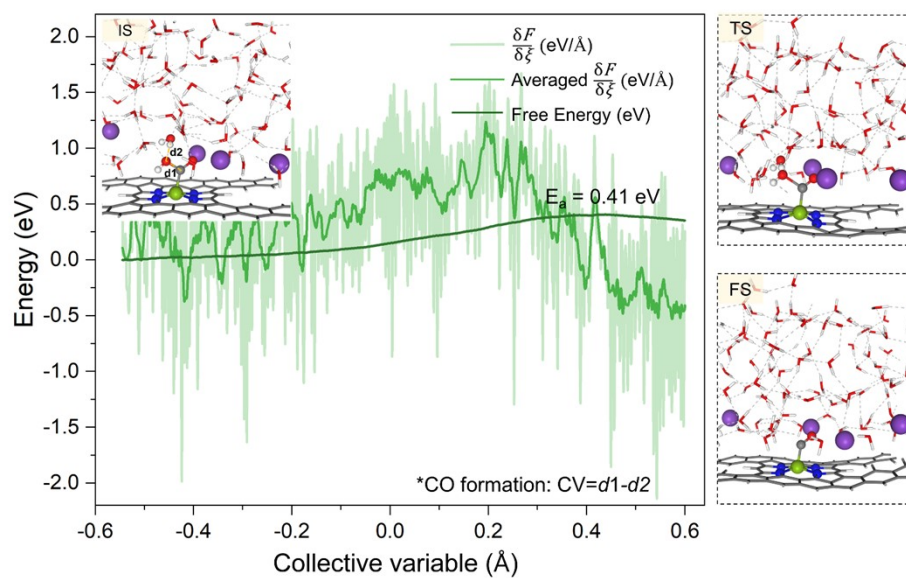

**Fig. S27.** Free energy profiles for \*CO formation under  $4K^+$  condition. The insert is the view of the initial state (IS) while the views of the transition state (TS) and final state (FS) are displayed on the right.

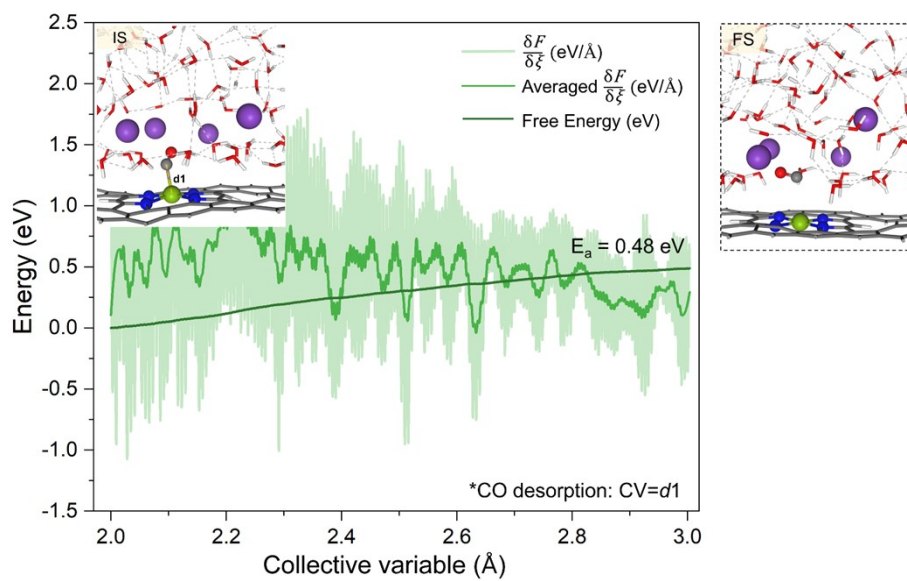

**Fig. S28.** Free energy profiles for \*CO desorption under  $4K^+$  condition. The insert is the view of the initial state (IS) while the views of the transition state (TS) and final state (FS) are displayed on the right.

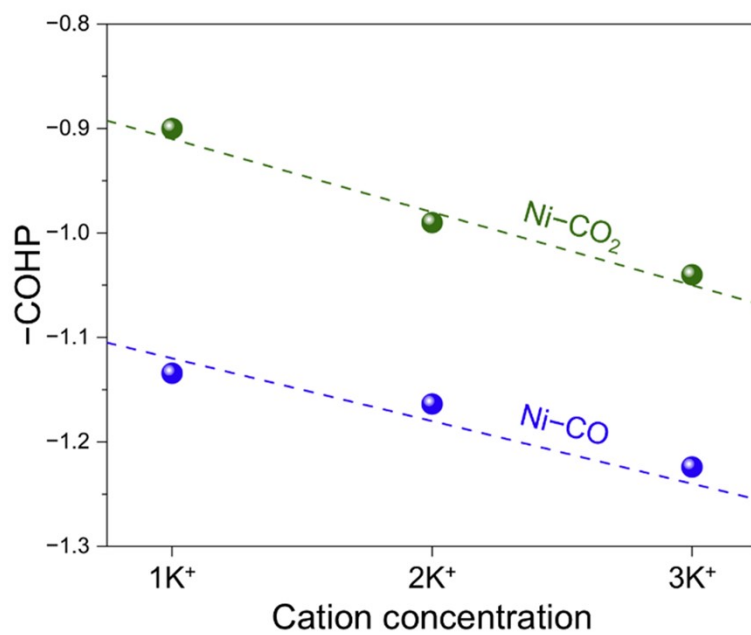

**Fig. S29.** Relationship between ICOHP value and cation concentration.

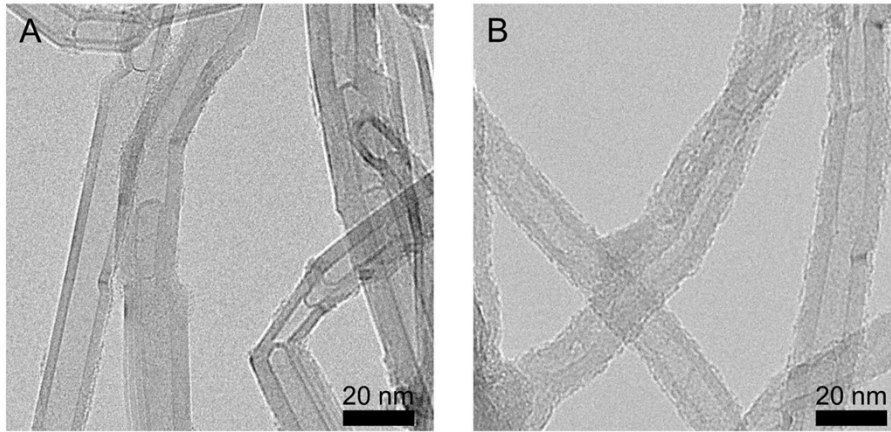

**Fig. S30.** TEM images of (a) pre-treated CNTs and (b) Ni-N<sub>pyrrolic</sub>@CNT.

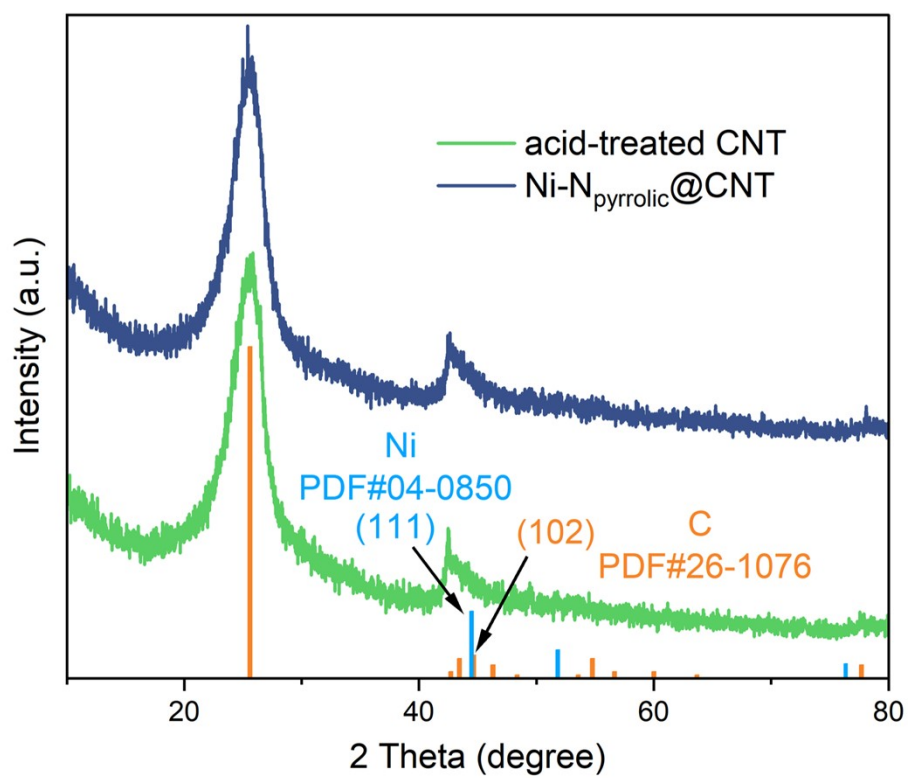

**Fig. S31.** X-ray diffraction (XRD) patterns of acid-treated CNT and Ni-N<sub>pyrrolic</sub>@CNT.

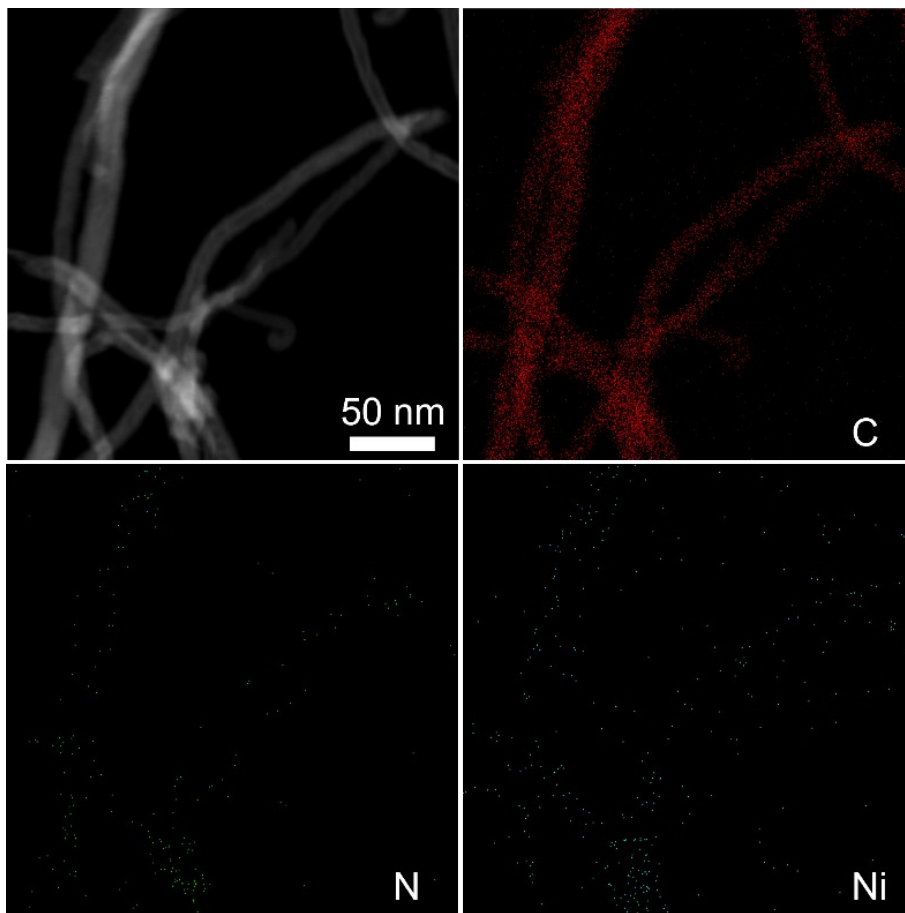

**Fig. S32.** HAADF-STEM image and the corresponding EDS elemental maps of Ni- $N_{\text{pyrrolic}}@CNT$ .

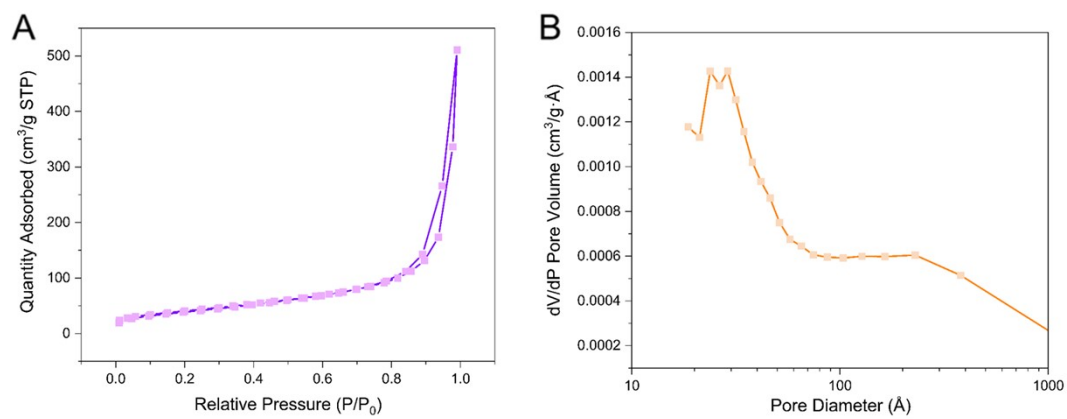

**Fig. S33.** (A) BET surface area analysis of Ni-N<sub>pyrrolic</sub>@CNT; (B) Pore size distribution of Ni-N<sub>pyrrolic</sub>@CNT.

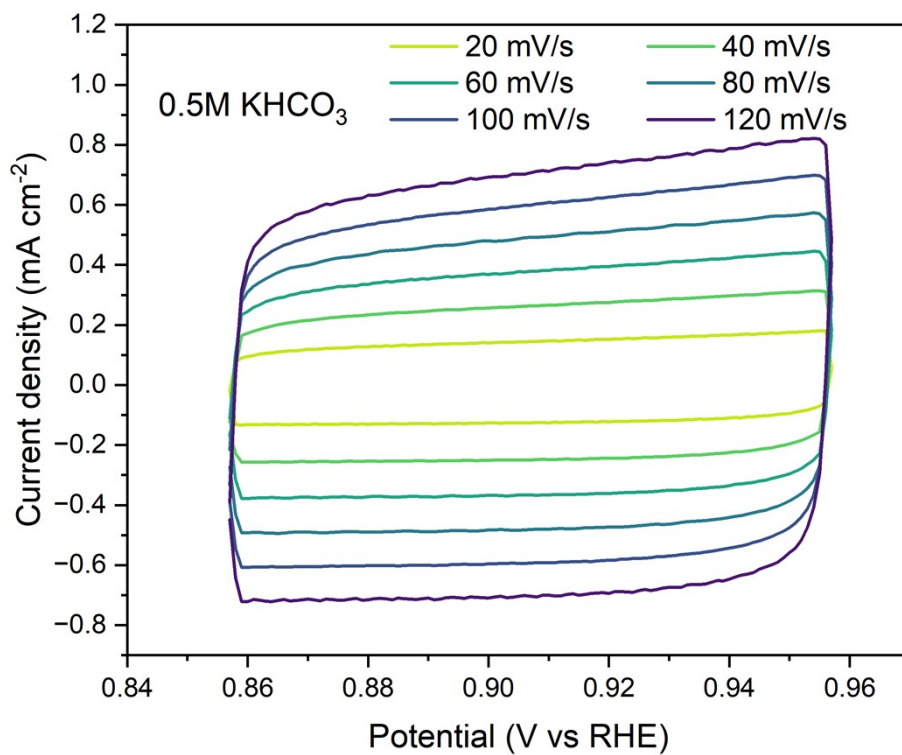

**Fig. S34.** CV curves at different scanning rates (20, 40, 60, 80, 100, 120 mV/s).

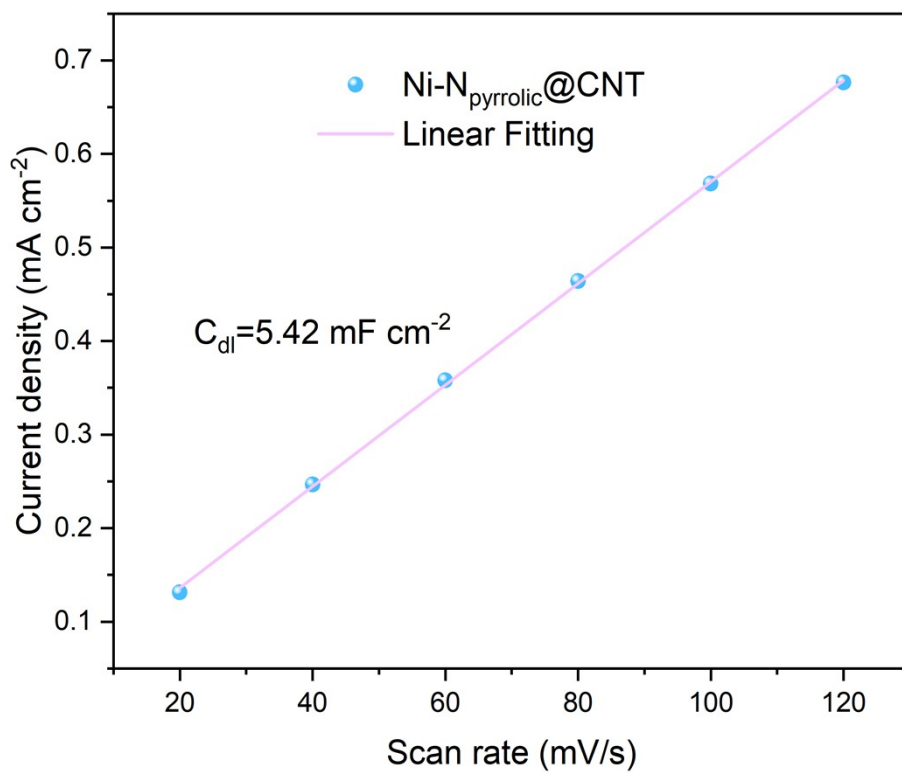

**Fig. S35.** Double-layer capacitor ( $C_{dl}$ ) of Ni-N<sub>pyrrolic</sub>@CNT.
